# Supplementary material for: The sorghum SWEET gene family: stem sucrose accumulation as revealed through transcriptome profiling
Source: PubMed Central journal article supplement (PMC4912755; doi:10.1186/s13068-016-0546-6), 2016-06-17

# A

|                                   |     |                                                               |           |           |       |                |    |
|-----------------------------------|-----|---------------------------------------------------------------|-----------|-----------|-------|----------------|----|
| Sobic.004G133500_SIL05.(SWEET4-1) | 1   | -----MVSPDTIRTAIGVI                                           | GNGTALVLF | SPVPTFIRI | IWKKG | GSVEQYSPIPYVAT | 50 |
| Sobic.004G133500_BTx623(SWEET4-1) | 1   | -----MVSPDTIRTAIGVI                                           | GNGTALVLF | SPVPTFIRI | IWKKG | GSVEQYSPIPYVAT | 50 |
| Sobic.004G133600_SIL05.(SWEET4-2) | 1   | MYQSFSTGFFCFVFGAPNPKDVID                                      | GNGTALVLF | SPVPTFVGI | IWKKR | AVEQYSPIPYVAT  | 60 |
| Sobic.004G133600_BTx623(SWEET4-2) | 1   | MYQSFSTGFFCFVFGAPNPKDVID                                      | GNGTALVLF | SPVPTFVGI | IWKKR | AVEQYSPIPYVAT  | 60 |
| Sobic.004G136600_SIL05.(SWEET4-3) | 1   | -----MISPDTIRTAIGVI                                           | GNGTALVLF | SPVPTFIRI | IWKKG | GSVEQYSPIPYVAT | 50 |
| Sobic.004G136600_BTx623(SWEET4-3) | 1   | -----MISPDTIRTAIGVI                                           | GNGTALVLF | SPVPTFIRI | IWKKG | GSVEQYSPIPYVAT | 50 |
|                                   |     |                                                               |           |           |       |                |    |
| Sobic.004G133500_SIL05.(SWEET4-1) | 51  | LLNCMMWVLYGLPVVHPHSMLVITINGTGMAIQLTYYVTLFLLYSAGAVRRKVFLLAAEV  | 110       |           |       |                |    |
| Sobic.004G133500_BTx623(SWEET4-1) | 51  | LLNCMMWVLYGLPVVHPHSMLVITINGTGMAIQLTYYVTLFLLYSAGAVRRKVFLLAAEV  | 110       |           |       |                |    |
| Sobic.004G133600_SIL05.(SWEET4-2) | 61  | LLNCMMWVLYGLPVVHPHSMLVITINGTGMLIQLSYVVLFILCSTGAVRRKVVLLFAAEV  | 120       |           |       |                |    |
| Sobic.004G133600_BTx623(SWEET4-2) | 61  | LLNCMMWVLYGLPVVHPHSMLVITINGTGMLIQLSYVVLFILCSTGAVRRKVVLLFAAEV  | 120       |           |       |                |    |
| Sobic.004G136600_SIL05.(SWEET4-3) | 51  | LLNCMMWVLYGLPAVHPHSMLVITINGTGMAIQLTYYVTLFLLFSAGAVRRKVVLLAAEV  | 110       |           |       |                |    |
| Sobic.004G136600_BTx623(SWEET4-3) | 51  | LLNCMMWVLYGLPAVHPHSMLVITINGTGMAIQLTYYVTLFLLFSAGAVRRKVVLLAAEV  | 110       |           |       |                |    |
|                                   |     |                                                               |           |           |       |                |    |
| Sobic.004G133500_SIL05.(SWEET4-1) | 111 | AFVGAVALVLTLAHTHERRSMIVGILCVLFGTGMYAAPLSVMKMVIQTKSVEYMPLFLS   | 170       |           |       |                |    |
| Sobic.004G133500_BTx623(SWEET4-1) | 111 | AFLGAVAAALVLTLAHTHERRSMIVGILCVLFGTGMYAAPLSVMKMVIQTKSVEYMPLFLS | 170       |           |       |                |    |
| Sobic.004G133600_SIL05.(SWEET4-2) | 121 | AFVVALAALVLSLAHTHERRSMVVGIVSVVFFGTGMYAAPLSVMKMVIETKSVEYMPLFLS | 180       |           |       |                |    |
| Sobic.004G133600_BTx623(SWEET4-2) | 121 | AFVVALAALVLSLAHTHERRSMVVGIVSVVFFGTGMYAAPLSVMKMVIETKSVEYMPLFLS | 180       |           |       |                |    |
| Sobic.004G136600_SIL05.(SWEET4-3) | 111 | AFVGAVALVLSLAHTHDRRSMVVGILCVLFGTGMYAAPLSVMKMVIQTKSVEYMPLFLS   | 170       |           |       |                |    |
| Sobic.004G136600_BTx623(SWEET4-3) | 111 | AFVGAVALVLSLAHTHDRRSMVVGILCVLFGTGMYAAPLSVMKMVIQTKSVEYMPLFLS   | 170       |           |       |                |    |
|                                   |     |                                                               |           |           |       |                |    |
| Sobic.004G133500_SIL05.(SWEET4-1) | 171 | LASLVNGICWTAYALIRFDLYITIPNGLGVLFAVAQLVLYAMYYKNTQKIIIEARKRKTD- | 229       |           |       |                |    |
| Sobic.004G133500_BTx623(SWEET4-1) | 171 | LASLVNGICWTAYALIRFDLYITIPNGLGVLFAVAQLVLYAMYYKNTQKIIIEARKRKTD- | 229       |           |       |                |    |
| Sobic.004G133600_SIL05.(SWEET4-2) | 181 | LASLANSICWTAYALIRFDVYITIPNGLGVLFALGQLVLYAMFYKNTQQIIIEARKRKADH | 240       |           |       |                |    |
| Sobic.004G133600_BTx623(SWEET4-2) | 181 | LASLANSICWTAYALIRFDVYITIPNGLGVLFALGQLVLYAMFYKNTQQIIIEARKRKADH | 240       |           |       |                |    |
| Sobic.004G136600_SIL05.(SWEET4-3) | 171 | LASLVNGICWTAYALIRFDLYITIPNGLGVLFAVAQLVLYAIYYKSTQEIIVEARKRKAD- | 229       |           |       |                |    |
| Sobic.004G136600_BTx623(SWEET4-3) | 171 | LASLVNGICWTAYALIRFDLYITIPNGLGVLFAVAQLVLYAIYYKSTQEIIVEARKRKAE- | 229       |           |       |                |    |
|                                   |     |                                                               |           |           |       |                |    |
| Sobic.004G133500_SIL05.(SWEET4-1) | 230 | -QVAMTEVVVDGSGRASNNNTY                                        | 250       |           |       |                |    |
| Sobic.004G133500_BTx623(SWEET4-1) | 230 | -QVAMTEVVVDGSGRASNNNTY                                        | 250       |           |       |                |    |
| Sobic.004G133600_SIL05.(SWEET4-2) | 241 | QQGTVMEEVVTDATPPNNNGNTY                                       | 262       |           |       |                |    |
| Sobic.004G133600_BTx623(SWEET4-2) | 241 | QQGTVMEEVVTDATPPNNNGNTY                                       | 262       |           |       |                |    |
| Sobic.004G136600_SIL05.(SWEET4-3) | 230 | -QVAMTEVVVIDGGKTNNHASGY                                       | 250       |           |       |                |    |
| Sobic.004G136600_BTx623(SWEET4-3) | 230 | -QVAMTEVVVIDGGKTNNHASGY                                       | 250       |           |       |                |    |

# B

|                                      |     |                                                              |     |
|--------------------------------------|-----|--------------------------------------------------------------|-----|
| Sobic.004G133500_SIL05 (SbSWEET4-1)  | 1   | MVSPDTIRTAIGVINGGTALVLFVLPVPTFIRIWKKGSVEQYSPIPYVATLLNCMMWVLY | 60  |
| Brachypodium distachyon_Bradi3g10270 | 1   | MVSPDTIRTAIGVINGGTALVLFVLPVPTFYRIWKKRSVEQYSAPYPLATLLNCMIWVLY | 60  |
| Oryza_sativa_LOC_Os02g19820          | 1   | MVSPDTIRTAIGVINGGTALVLFVLPVPTFIRIWKKGSVEQYSAPYVATLLNCMMWVLY  | 60  |
| Setaria italica_1G135700.1           | 1   | MVSPDTIRTAIGVINGGTALVLFVLPVPTFIRIWKKGSVEQYSPIPYVATLLNCMMWVLY | 60  |
| Zea_mays_GRMZM2G000812               | 1   | MVSPDTIRTAIGVINGGTALVLFVLPVPTFIRIWKKGSVEQYSPIPYVATLLNCMMWVLY | 60  |
|                                      |     |                                                              |     |
| Sobic.004G133500_SIL05               | 61  | GLPVVHPHSMLVITINGTGMAIQLTYVTLFLLYSAGAVRRKVFLLAAEVAFVGVAAALV  | 120 |
| Brachypodium distachyon_Bradi3g10270 | 61  | GLPLVHPNSMLVITINGTGMAIELAYVALFLACSAGAARRRVLLILVAEVAFVAAVAALV | 120 |
| Oryza_sativa_LOC_Os02g19820          | 61  | GLPAVHPHSMLVITINGTGMAIELTYIALFLAFSLGAVRRRVLLLLAAEVAFVAAVAALV | 120 |
| Setaria italica_1G135700.1           | 61  | GLPLVHPHSMLVITINGTGMAIELTYVTLFLLYSTGAARRKVFLLAAEVAFVGVAAALV  | 120 |
| Zea_mays_GRMZM2G000812               | 61  | GLPAVHPHSMLVITINGTGMAIQLTYVALFLLYSVGAARRKVFLLAAEVAFVGVAAALV  | 120 |
|                                      |     |                                                              |     |
| Sobic.004G133500_SIL05               | 121 | LTLAHTHERRSMVVGILCVLFGTGMYAAPLSVMKMVIQTKSVEYMPLFSLASLVNGICW  | 180 |
| Brachypodium distachyon_Bradi3g10270 | 121 | LALAHTYERRSMVVGILGVLFGTGMYAAPLSVMKMVIQTKSVEYMPLFSLASLVNGICW  | 180 |
| Oryza_sativa_LOC_Os02g19820          | 121 | LNLAHTHERRSMVVGILCVLFGTGMYAAPLSVMKMVIQTKSVEYMPLFSLASLVNGICW  | 180 |
| Setaria italica_1G135700.1           | 121 | LSLAHTHERRSMVVGILCVLFGTGMYAAPLSVMKMVIQTKSVEYMPLFSLASLVNGICW  | 180 |
| Zea_mays_GRMZM2G000812               | 121 | LSLAHTHERRSMVVGILCVLFGTGMYAAPLSVMKMVIQTKSVEYMPLFSLASLVNGICW  | 180 |
|                                      |     |                                                              |     |
| Sobic.004G133500_SIL05               | 181 | TAYALIRFDLYITIPNGLGVLFAVAQLVLYAIYYKNTQKIIEARKRK-TDQVAMTEVVVD | 239 |
| Brachypodium distachyon_Bradi3g10270 | 181 | TAYALIRFDLYITIPNGLGVMFAVGQVILYAIYYKSTQQLIEARKRK-TDQVAMTEVVVD | 239 |
| Oryza_sativa_LOC_Os02g19820          | 181 | TAYALIRFDLYITIPNGLGVMFAVAQLVLYAIYYKSTQQLIEARKRKEADHVAMTDVVVD | 240 |
| Setaria italica_1G135700.1           | 181 | TAYALIKFDLYITIPNGLGVLFAVAQVLYAIYYKSTQELIEARKRK-ADQVAMTEVVV-  | 238 |
| Zea_mays_GRMZM2G000812               | 181 | TAYALIRFDLYITIPNGLGVLFAVAQLVLYAIYYKSTQELIEARKRK-ADQIAMTGVVVD | 239 |
|                                      |     |                                                              |     |
| Sobic.004G133500_SIL05               | 240 | GSGRASNNNTY-----                                             | 250 |
| Brachypodium distachyon_Bradi3g10270 | 240 | AKNSGAGNGNYL-----                                            | 251 |
| Oryza_sativa_LOC_Os02g19820          | 241 | SAKNNPSSGAAAAAANGRY                                          | 259 |
| Setaria italica_1G135700.1           | 239 | VGKTNNHAGAGHY-----                                           | 251 |
| Zea_mays_GRMZM2G000812               | 240 | GGKTNNQAGAGQY-----                                           | 252 |

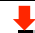

Supplement: 13068_2016_546_MOESM1_ESM.pdf [file 13068_2016_546_MOESM1_ESM.pdf]
